# Supplementary material
Source: PubMed Central journal article supplement (PMC2397313)

## SUPPLEMENTAL DATA

Cohen et al.

### FIGURE LEGENDS

**Figure S1: Effect of deletion of the F-box of Mdm30p expressed at endogenous levels on mitochondrial morphology, respiration and degradation of Fzo1p**

(A) Mitochondrial morphology was assessed in wild type (vector) (W303 background), *mdm30Δ* (vector), or *mdm30Δ* cells expressing either Mdm30-HA or F-box deletion mutant of Mdm30-HA ( $\Delta$ *fbx-HA*) from the *MDM30* promoter. (B) The same strains as described in panel A were grown at 37° C on selective media containing either dextrose or glycerol as the only carbon source. (C) Rate of Fzo1p degradation was analysed in the indicated strains (W303 background) after shift to 37°C and treatment with CHX. Yeast extracts were prepared at the indicated times and remaining Fzo1p or Mdm30-HA evaluated by immunoblotting. Levels of a stable protein, phosphoglucokinase (PGK) is shown as a loading control. (D) As Mdm30-HA is undetectable in whole cell lysates when expressed from the *MDM30* promoter, immunoprecipitates with HA antibody (IP:HA) from strains used in C were immunoblotted with anti-HA antibody (IB:HA).

**Figure S2: Ubiquitylated Fzo1p is localized to mitochondria.**

(A) Localization of Fzo1p in sucrose gradient. A mitochondrial-enriched pellet was loaded onto a sucrose cushion (15%, 23%, 32% and 60% sucrose in MOPS buffer) as described (Meisinger *et al.*, 2000). After 1 h centrifugation at 134,000g, the majority of the mitochondria migrate at the 60/32% interface. Nine fractions surrounding this

interface were collected and resolved by SDS-PAGE after TCA precipitation. Fzo1p, Tom20p (Mitochondrial marker) and Cue1p (ER marker) were analyzed in fractions 1 to 9, cytosolic fraction (S) and pellet fraction (P). Fzo1p co-localizes with Tom20p to fraction 7.

(B) Enlargement of Fzo1p immunoblot from fraction 7. Unmodified and modified forms of Fzo1p are indicated by thick and thin arrows respectively.

## TABLES

**Supplemental Data, Table 1. Strains and plasmids used in this study.**

| Strains                                | Genotypes                                                                                                                                                                                                                                           | Reference                            |
|----------------------------------------|-----------------------------------------------------------------------------------------------------------------------------------------------------------------------------------------------------------------------------------------------------|--------------------------------------|
| BY4742                                 | <i>MAT<math>\alpha</math></i> ; <i>his3<math>\Delta</math>1</i> ; <i>leu2<math>\Delta</math>0</i> ; <i>lys2<math>\Delta</math>0</i> ; <i>ura3<math>\Delta</math>0</i>                                                                               | Euroscarf                            |
| BY4742 <i>fzo1<math>\Delta</math></i>  | <i>MAT<math>\alpha</math></i> ; <i>his3<math>\Delta</math>1</i> ; <i>leu2<math>\Delta</math>0</i> ; <i>lys2<math>\Delta</math>0</i> ; <i>ura3<math>\Delta</math>0</i> YBR179C:: <i>kanMX4</i>                                                       | Euroscarf                            |
| BY4742 <i>mdm30<math>\Delta</math></i> | <i>MAT<math>\alpha</math></i> ; <i>his3<math>\Delta</math>1</i> ; <i>leu2<math>\Delta</math>0</i> ; <i>lys2<math>\Delta</math>0</i> ; <i>ura3<math>\Delta</math>0</i> YLR368w:: <i>kanMX4</i>                                                       | Euroscarf                            |
| W303                                   | <i>MATa</i> ; <i>ura3-52</i> ; <i>trp1<math>\Delta</math>2</i> ; <i>leu2-3_112</i> ; <i>his3-11</i> ; <i>ade2-1</i> ; <i>can1-100</i>                                                                                                               |                                      |
| W303 FZO1-HA                           | <i>MATa</i> ; <i>ura3-52</i> ; <i>trp1<math>\Delta</math>2</i> ; <i>leu2-3_112</i> ; <i>his3-11</i> ; <i>ade2-1</i> ; <i>can1-100</i> FZO1-3HA-HIS3                                                                                                 | This study                           |
| W303 <i>mdm30<math>\Delta</math></i>   | <i>MATa</i> ; <i>ura3-52</i> ; <i>trp1<math>\Delta</math>2</i> ; <i>leu2-3_112</i> ; <i>his3-11</i> ; <i>ade2-1</i> ; <i>can1-100</i> YLR368w:: <i>kanMX6</i>                                                                                       | This study                           |
| WT-CMY                                 | <i>MATa</i> ; <i>his3-<math>\Delta</math>200</i> ; <i>ade2-101</i> ; <i>lys2<math>\Delta</math>1</i> ; <i>ura3-52</i> ; <i>lys2-801</i> ; <i>trp1<math>\Delta</math>62</i> ; <i>bar1::HIS3</i>                                                      | (Rinaldi <i>et al.</i> , 2004)       |
| CMY- <i>mpr1-1</i>                     | <i>MATa</i> ; <i>his3-<math>\Delta</math>200</i> ; <i>ade2-101</i> ; <i>lys2<math>\Delta</math>1</i> ; <i>ura3-52</i> ; <i>lys2-801</i> ; <i>trp1<math>\Delta</math>62</i> ; <i>bar1::HIS3</i> , <i>mpr1-1</i>                                      | (Rinaldi <i>et al.</i> , 2004)       |
| WCG4                                   | <i>MATa</i> ; <i>ura3-52</i> ; <i>leu2-3_112</i> ; <i>his3-11</i>                                                                                                                                                                                   | (Richter-Ruoff <i>et al.</i> , 1994) |
| WCG4 FZO1-HA                           | <i>MATa</i> ; <i>ura3-52</i> ; <i>leu2-3_112</i> ; <i>his3-11</i> FZO1-3HA-KanMX6                                                                                                                                                                   | This study                           |
| <i>pre1-1 pre2-2</i>                   | <i>MATa</i> ; <i>ura3-52</i> ; <i>leu2-3_112</i> ; <i>his3-11</i> ; <i>pre1-1 pre2-2</i>                                                                                                                                                            | (Richter-Ruoff <i>et al.</i> , 1994) |
| <i>pre1-1 pre2-2</i> FZO1-HA           | <i>MATa</i> ; <i>ura3-52</i> ; <i>leu2-3_112</i> ; <i>his3-11</i> ; <i>pre1-1 pre2-2</i> FZO1-3HA-KanMX6                                                                                                                                            | This study                           |
| Sub62                                  | <i>MATa</i> ; <i>his3-<math>\Delta</math>200</i> ; <i>lys2-801</i> ; <i>leu2-3_112</i> ; <i>trp1-1</i> ; <i>ura3-52</i>                                                                                                                             | (Rubin <i>et al.</i> , 1998)         |
| <i>rpt2RF</i>                          | <i>MATa</i> ; <i>his3-<math>\Delta</math>200</i> ; <i>lys2-801</i> ; <i>leu2-3_112</i> ; <i>trp1-1</i> ; <i>ura3-52</i> ; <i>rpt2RF</i>                                                                                                             | (Rubin <i>et al.</i> , 1998)         |
| YPH499 (Cim WT)                        | <i>MATa</i> ; <i>ura3-52</i> ; <i>lys2-801</i> ; <i>ade2-101</i> ; <i>trp1-<math>\Delta</math>63</i> ; <i>his3-<math>\Delta</math>200</i> ; <i>leu2-<math>\Delta</math>1</i>                                                                        | (Ghislain <i>et al.</i> , 1993)      |
| CMY763 ( <i>Cim3-1</i> )               | <i>MAT<math>\alpha</math></i> ; <i>ura3-52</i> ; <i>leu2<math>\Delta</math>1</i> <i>his3-<math>\Delta</math>200</i> ; <i>cim3-1</i>                                                                                                                 | (Ghislain <i>et al.</i> , 1993)      |
| W303-1A                                | <i>MATa</i> ; <i>ura3-1</i> ; <i>can1-100</i> ; <i>GAL+</i> ; <i>leu2-3_112</i> ; <i>trp1-1</i> ; <i>ade2-1</i> ; <i>his3-11,15</i>                                                                                                                 |                                      |
| W303-1A FZO1-HA                        | <i>MATa</i> ; <i>ura3-1</i> ; <i>can1-100</i> ; <i>GAL+</i> ; <i>leu2-3_112</i> ; <i>trp1-1</i> ; <i>ade2-1</i> ; <i>his3-11,15</i> FZO1-3HA-KanMX6                                                                                                 | This study                           |
| <i>cdc53ts</i>                         | <i>MATa</i> ; <i>ura3-1</i> ; <i>can1-100</i> ; <i>GAL+</i> ; <i>leu2-3_112</i> ; <i>trp1-1</i> ; <i>ade2-1</i> ; <i>his3-11,15</i> ; <i>cdc53-1</i>                                                                                                | (Willems <i>et al.</i> , 1996)       |
| <i>cdc53ts</i> FZO1-HA                 | <i>MATa</i> ; <i>ura3-1</i> ; <i>can1-100</i> ; <i>GAL+</i> ; <i>leu2-3_112</i> ; <i>trp1-1</i> ; <i>ade2-1</i> ; <i>his3-11,15</i> ; <i>cdc53-1</i> FZO1-3HA-KanMX6                                                                                | This study                           |
| <i>cdc34ts</i>                         | <i>MATa</i> ; <i>ura3-1</i> ; <i>can1-100</i> ; <i>GAL+</i> ; <i>leu2-3_112</i> ; <i>trp1-1</i> ; <i>ade2-1</i> ; <i>his3-11,15</i> ; <i>cdc34-2</i>                                                                                                | (Willems <i>et al.</i> , 1996)       |
| <i>cdc34ts</i> FZO1-HA                 | <i>MATa</i> ; <i>ura3-1</i> ; <i>can1-100</i> ; <i>GAL+</i> ; <i>leu2-3_112</i> ; <i>trp1-1</i> ; <i>ade2-1</i> ; <i>his3-11,15</i> ; <i>cdc34-2</i> FZO1-3HA-KanMX6                                                                                | This study                           |
| SUB280                                 | <i>MATa</i> ; <i>lys2-801</i> ; <i>leu2-3_2-112</i> ; <i>ura3-52</i> ; <i>his3-D200</i> ; <i>trp1-1</i> ; <i>ubi1HTRP1</i> ; <i>ubi2-D2Hura3</i> ; <i>ubi3-Dub2</i> ; <i>ubi4-D2HLEU2</i> ; [pUB39 wild-type ubiquitin] [pUB100]                    | D. Finley                            |
| SUB592                                 | <i>MATa</i> ; <i>lys2-801</i> ; <i>leu2-3_2-112</i> ; <i>ura3-52</i> ; <i>his3-D200</i> ; <i>trp1-1</i> ; <i>ubi1HTRP1</i> ; <i>ubi2-D2Hura3</i> ; <i>ubi3-Dub2</i> ; <i>ubi4-D2HLEU2</i> ; [pUB221: His6-cMyc-Ubiquitin] [pUB100]                  | D. Finley                            |
| SUB592 FZO1-HA                         | <i>MATa</i> ; <i>lys2-801</i> ; <i>leu2-3_2-112</i> ; <i>ura3-52</i> ; <i>his3-D200</i> ; <i>trp1-1</i> ; FZO1-3HA-KanMX6; <i>ubi1HTRP1</i> ; <i>ubi2-D2Hura3</i> ; <i>ubi3-Dub2</i> ; <i>ubi4-D2HLEU2</i> ; [pUB221: His6-cMyc-Ubiquitin] [pUB100] | This study                           |
| <b>Plasmids</b>                        |                                                                                                                                                                                                                                                     | <b>Reference</b>                     |
| pUb70(empty vector)                    | 2 micron, CUP1 promoter, LYS2, Amp                                                                                                                                                                                                                  | D. Finley                            |
| pUb39 (Ub WT)                          | 2 micron, CUP1 promoter, Ub, LYS2, Amp                                                                                                                                                                                                              | D. Finley                            |
| pUb115 (Ub K48R)                       | 2 micron, CUP1 promoter, UbK48R, LYS2, Amp                                                                                                                                                                                                          | D. Finley                            |
| pUb197 (Ub K63R)                       | 2 micron, CUP1 promoter, UbK63R, LYS2, Amp                                                                                                                                                                                                          | D. Finley                            |
| pRS316                                 | CEN, URA3, Amp                                                                                                                                                                                                                                      | (Sikorski and Hieter, 1989)          |
| pMDM30-HA                              | CEN, MDM30 promoter-MDM30-HA, URA3, Amp                                                                                                                                                                                                             | This study                           |
| p $\Delta$ fbox-HA                     | CEN, MDM30 promoter- <i>mdm30-HA fbox<math>\Delta</math></i> , URA3, Amp                                                                                                                                                                            | This study                           |
| p426-TEF                               | 2 micron, TEF promoter, URA3, Amp                                                                                                                                                                                                                   | (Mumberg <i>et al.</i> , 1995)       |
| pTEF-MDM30-HA                          | 2 micron, TEF promoter-MDM30-HA, URA3, Amp                                                                                                                                                                                                          | This study                           |
| pTEF-fbox-HA                           | 2 micron, TEF promoter- <i>mdm30-HA fbox</i> , URA3, Amp                                                                                                                                                                                            | This study                           |
| pYX232-mtGFP                           | 2 micron, TPI promoter-mtGFP, TRP1, Amp                                                                                                                                                                                                             | B.Westermann                         |

**Supplemental Data, Table 2. Numerical data from Figure 1B.**

| Strain                         | Number of cells (%) |           |            |           | TOTAL |
|--------------------------------|---------------------|-----------|------------|-----------|-------|
|                                | Aggregated          | Fizzed    | Tubular    | Fused     |       |
| WT vector                      | 25 (7.6)            | 25 (7.6)  | 237 (71.8) | 43 (13)   | 330   |
| <i>mdm30</i> Δ vector          | 203 (67)            | 15 (5)    | 67 (22.1)  | 18 (5.9)  | 303   |
| <i>mdm30</i> Δ MDM30-HA        | 36 (10.1)           | 77 (21.5) | 193 (53.9) | 52 (14.5) | 358   |
| <i>mdm30</i> Δ <i>fbox</i> -HA | 189 (66.1)          | 27 (9.4)  | 60 (21)    | 10 (3.5)  | 286   |

**REFERENCES**

Ghislain, M., Udvardy, A., and Mann, C. (1993). *S. cerevisiae* 26S protease mutants arrest cell division in G2/metaphase. *Nature* 366, 358-362.

Meisinger, C., Sommer, T., and Pfanner, N. (2000). Purification of *Saccharomyces cerevisiae* mitochondria devoid of microsomal and cytosolic contaminations. *Anal Biochem* 287, 339-342.

Mumberg, D., Muller, R., and Funk, M. (1995). Yeast vectors for the controlled expression of heterologous proteins in different genetic backgrounds. *Gene* 156, 119-122.

Richter-Ruoff, B., Wolf, D.H., and Hochstrasser, M. (1994). Degradation of the yeast MAT alpha 2 transcriptional regulator is mediated by the proteasome. *FEBS Lett* 354, 50-52.

Rinaldi, T., Pick, E., Gambadoro, A., Zilli, S., Maytal-Kivity, V., Frontali, L., and Glickman, M.H. (2004). Participation of the proteasomal lid subunit Rpn11 in mitochondrial morphology and function is mapped to a distinct C-terminal domain. *Biochem J* 381, 275-285.

Rubin, D.M., Glickman, M.H., Larsen, C.N., Dhruvakumar, S., and Finley, D. (1998). Active site mutants in the six regulatory particle ATPases reveal multiple roles for ATP in the proteasome. *Embo J* 17, 4909-4919.

Sikorski, R.S., and Hieter, P. (1989). A system of shuttle vectors and yeast host strains designed for efficient manipulation of DNA in *Saccharomyces cerevisiae*. *Genetics* 122, 19-27.

Willems, A.R., Lanker, S., Patton, E.E., Craig, K.L., Nason, T.F., Mathias, N., Kobayashi, R., Wittenberg, C., and Tyers, M. (1996). Cdc53 targets phosphorylated G1 cyclins for degradation by the ubiquitin proteolytic pathway. *Cell* 86, 453-463.

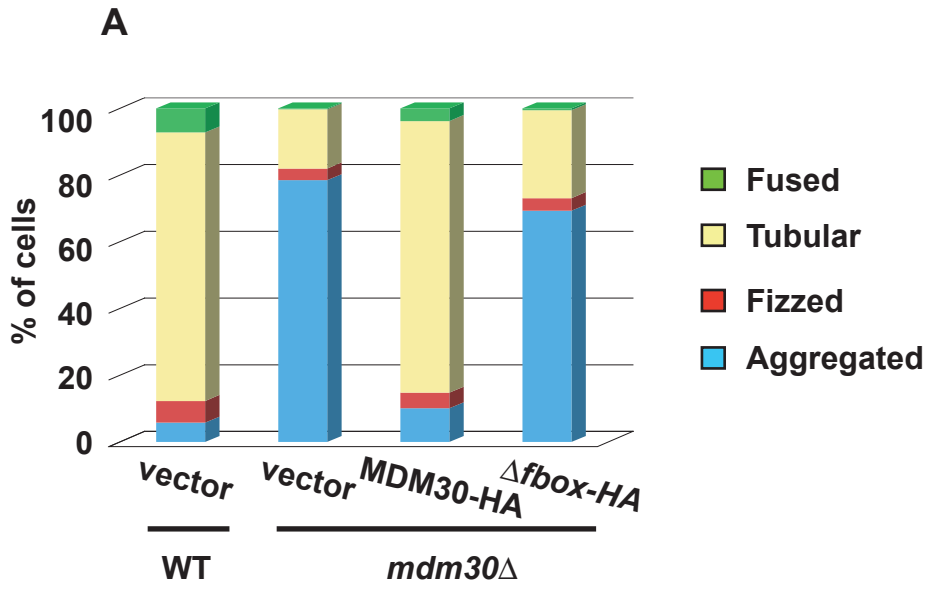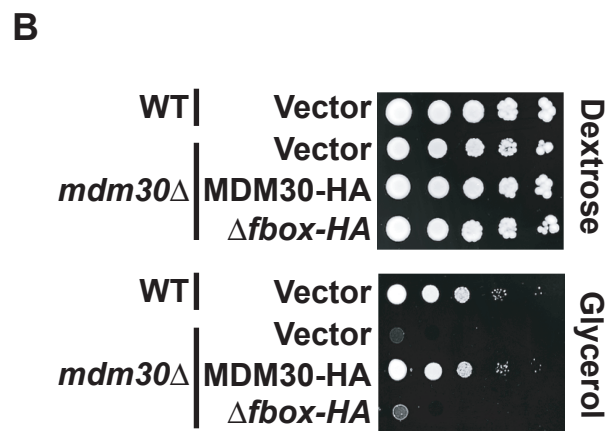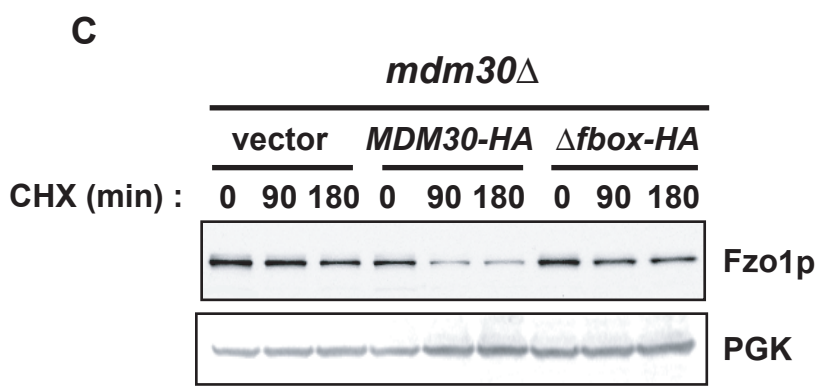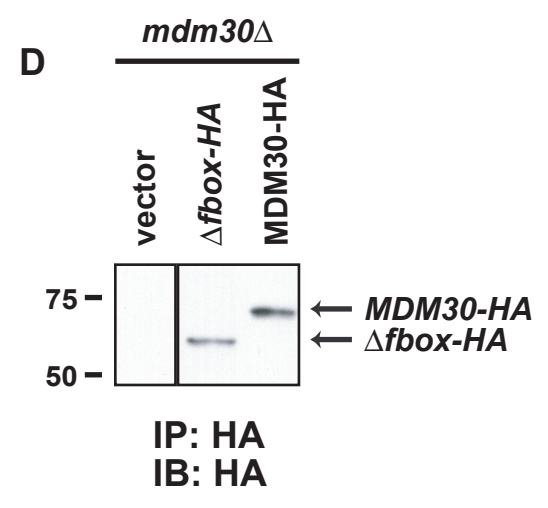

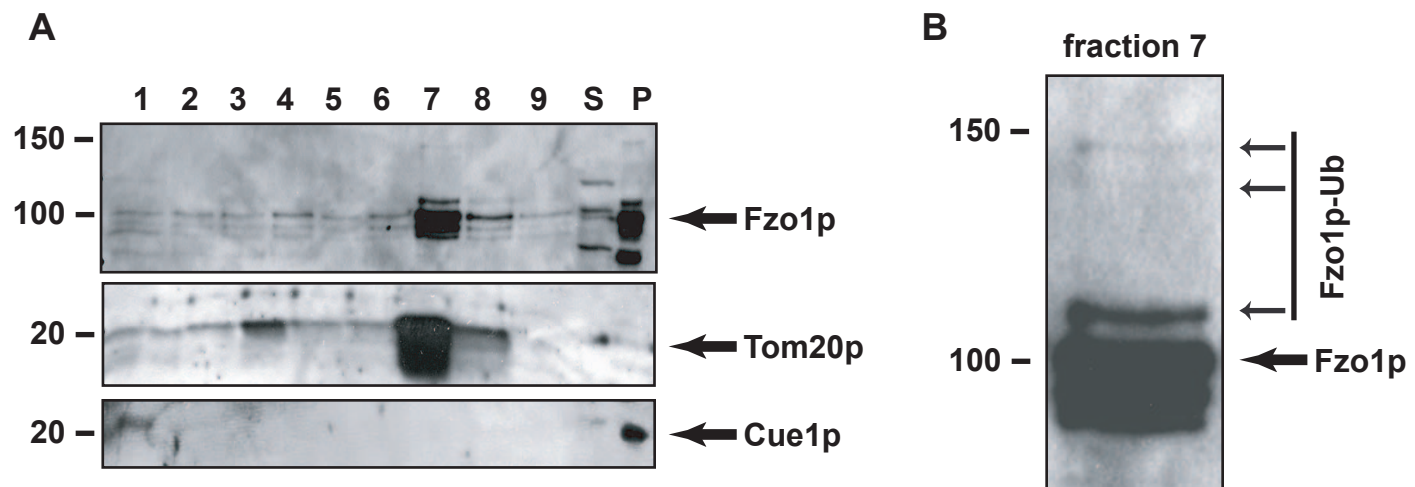

Supplement: E08-02-0227_1.pdf [file E08-02-0227_1.pdf]
